# Supplementary material
Source: publisher figshare collection journal article supplement (https://karger.figshare.com/ndownloader/files/13746563)

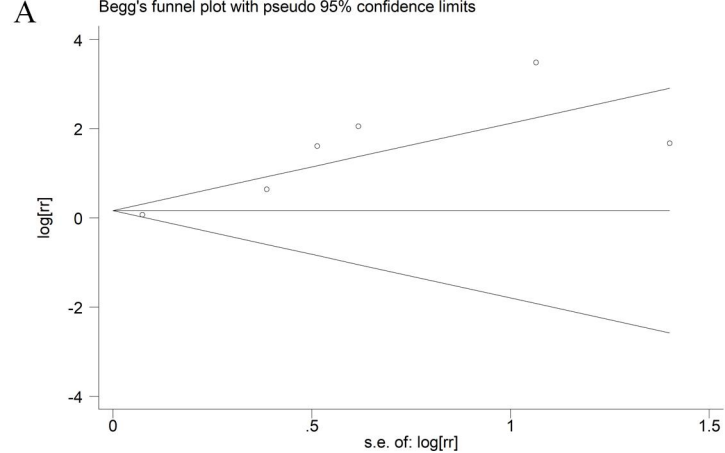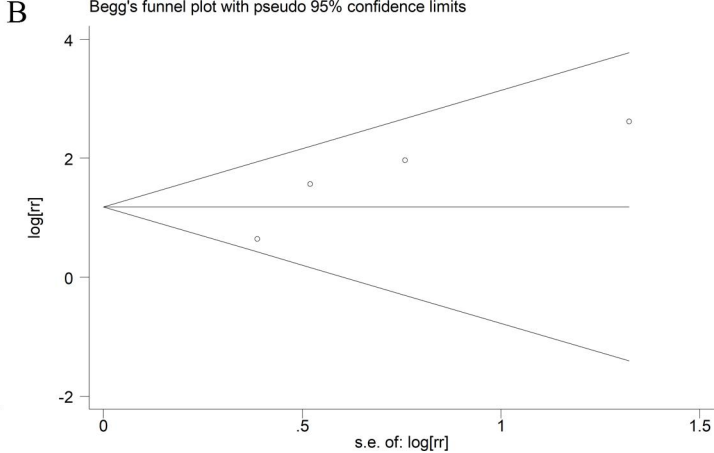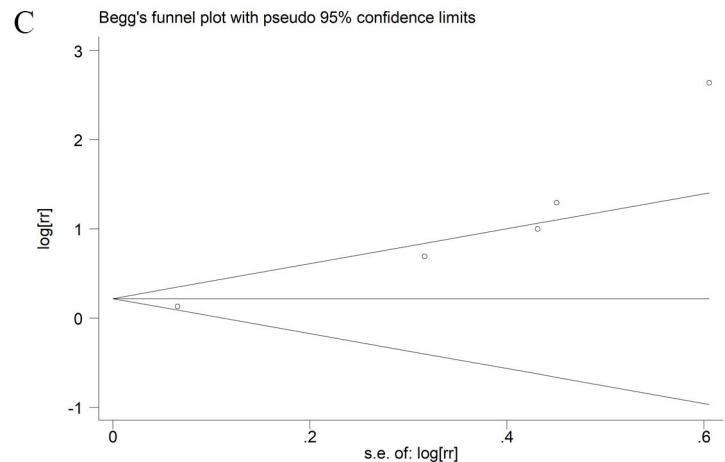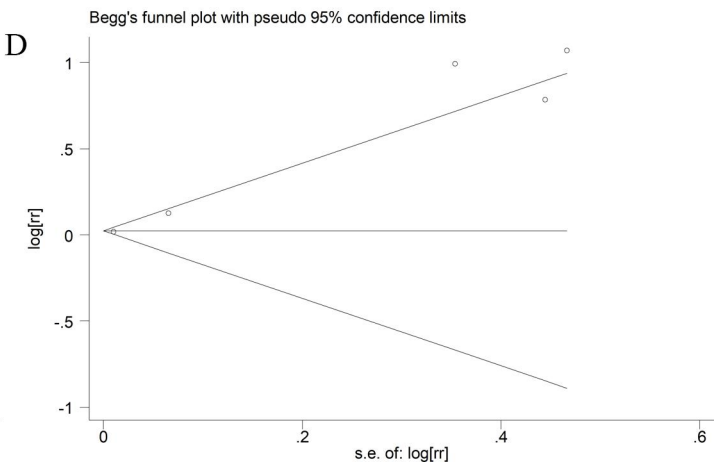

Supplement: Supplementary file 1 [file 13746563]
